# Supplementary material for: Qualitative exploration of mental health and its drivers in lesbian, bisexual and queer identifying women at a South African higher education institution
Source: Research Square preprint supplement (doi:10.21203/rs.3.rs-6353288/v1), 2025-04-24
Supplement: Supplementary file 1 [file a4c12b0a7cf8345596be3455.docx]

**Scope of Enquiry: Mental Health**

- Please share with us, in your view, what are the mental health issues that affect LGBTQI women on this campus.
  - Probes: Tell us about the characteristics (depression, substance use disorders, stigma, anxiety disorders etc). Tell us more about the life and academic stressors faced by LBQ women students. Tell us about any other sources of frustrations or drivers of mental ill-health for LBQ students? Which LBQ students are more likely to have mental ill health.
- Please share how mental health issues affect the daily lives of LBQ women students.
  - Probe: How do the mental health issues affect academics- productivity/performance/class attendance, friendships, relationships.
- Please share with us your thoughts on how LBQ students cope with these frustrations.
  - Probe What behaviors and strategies do LBQ students engage in to cope with frustrations?
- Alcohol and drugs abuse is known to be a common problem among university students. Please share your thoughts about the impact of alcohol and drugs on LBQ mental health and wellbeing.
- Can you share your thoughts about the psychosocial support and mental health services provided by the institution to LBQ students?
  - Probes: What are your views about available services?
  - What are the barriers and enablers for reporting incidents of sexual violence and utilizing available services on this campus?
